# Supplementary material
Source: PubMed Central journal article supplement (PMC1937520)

**A**

Number of Transitions

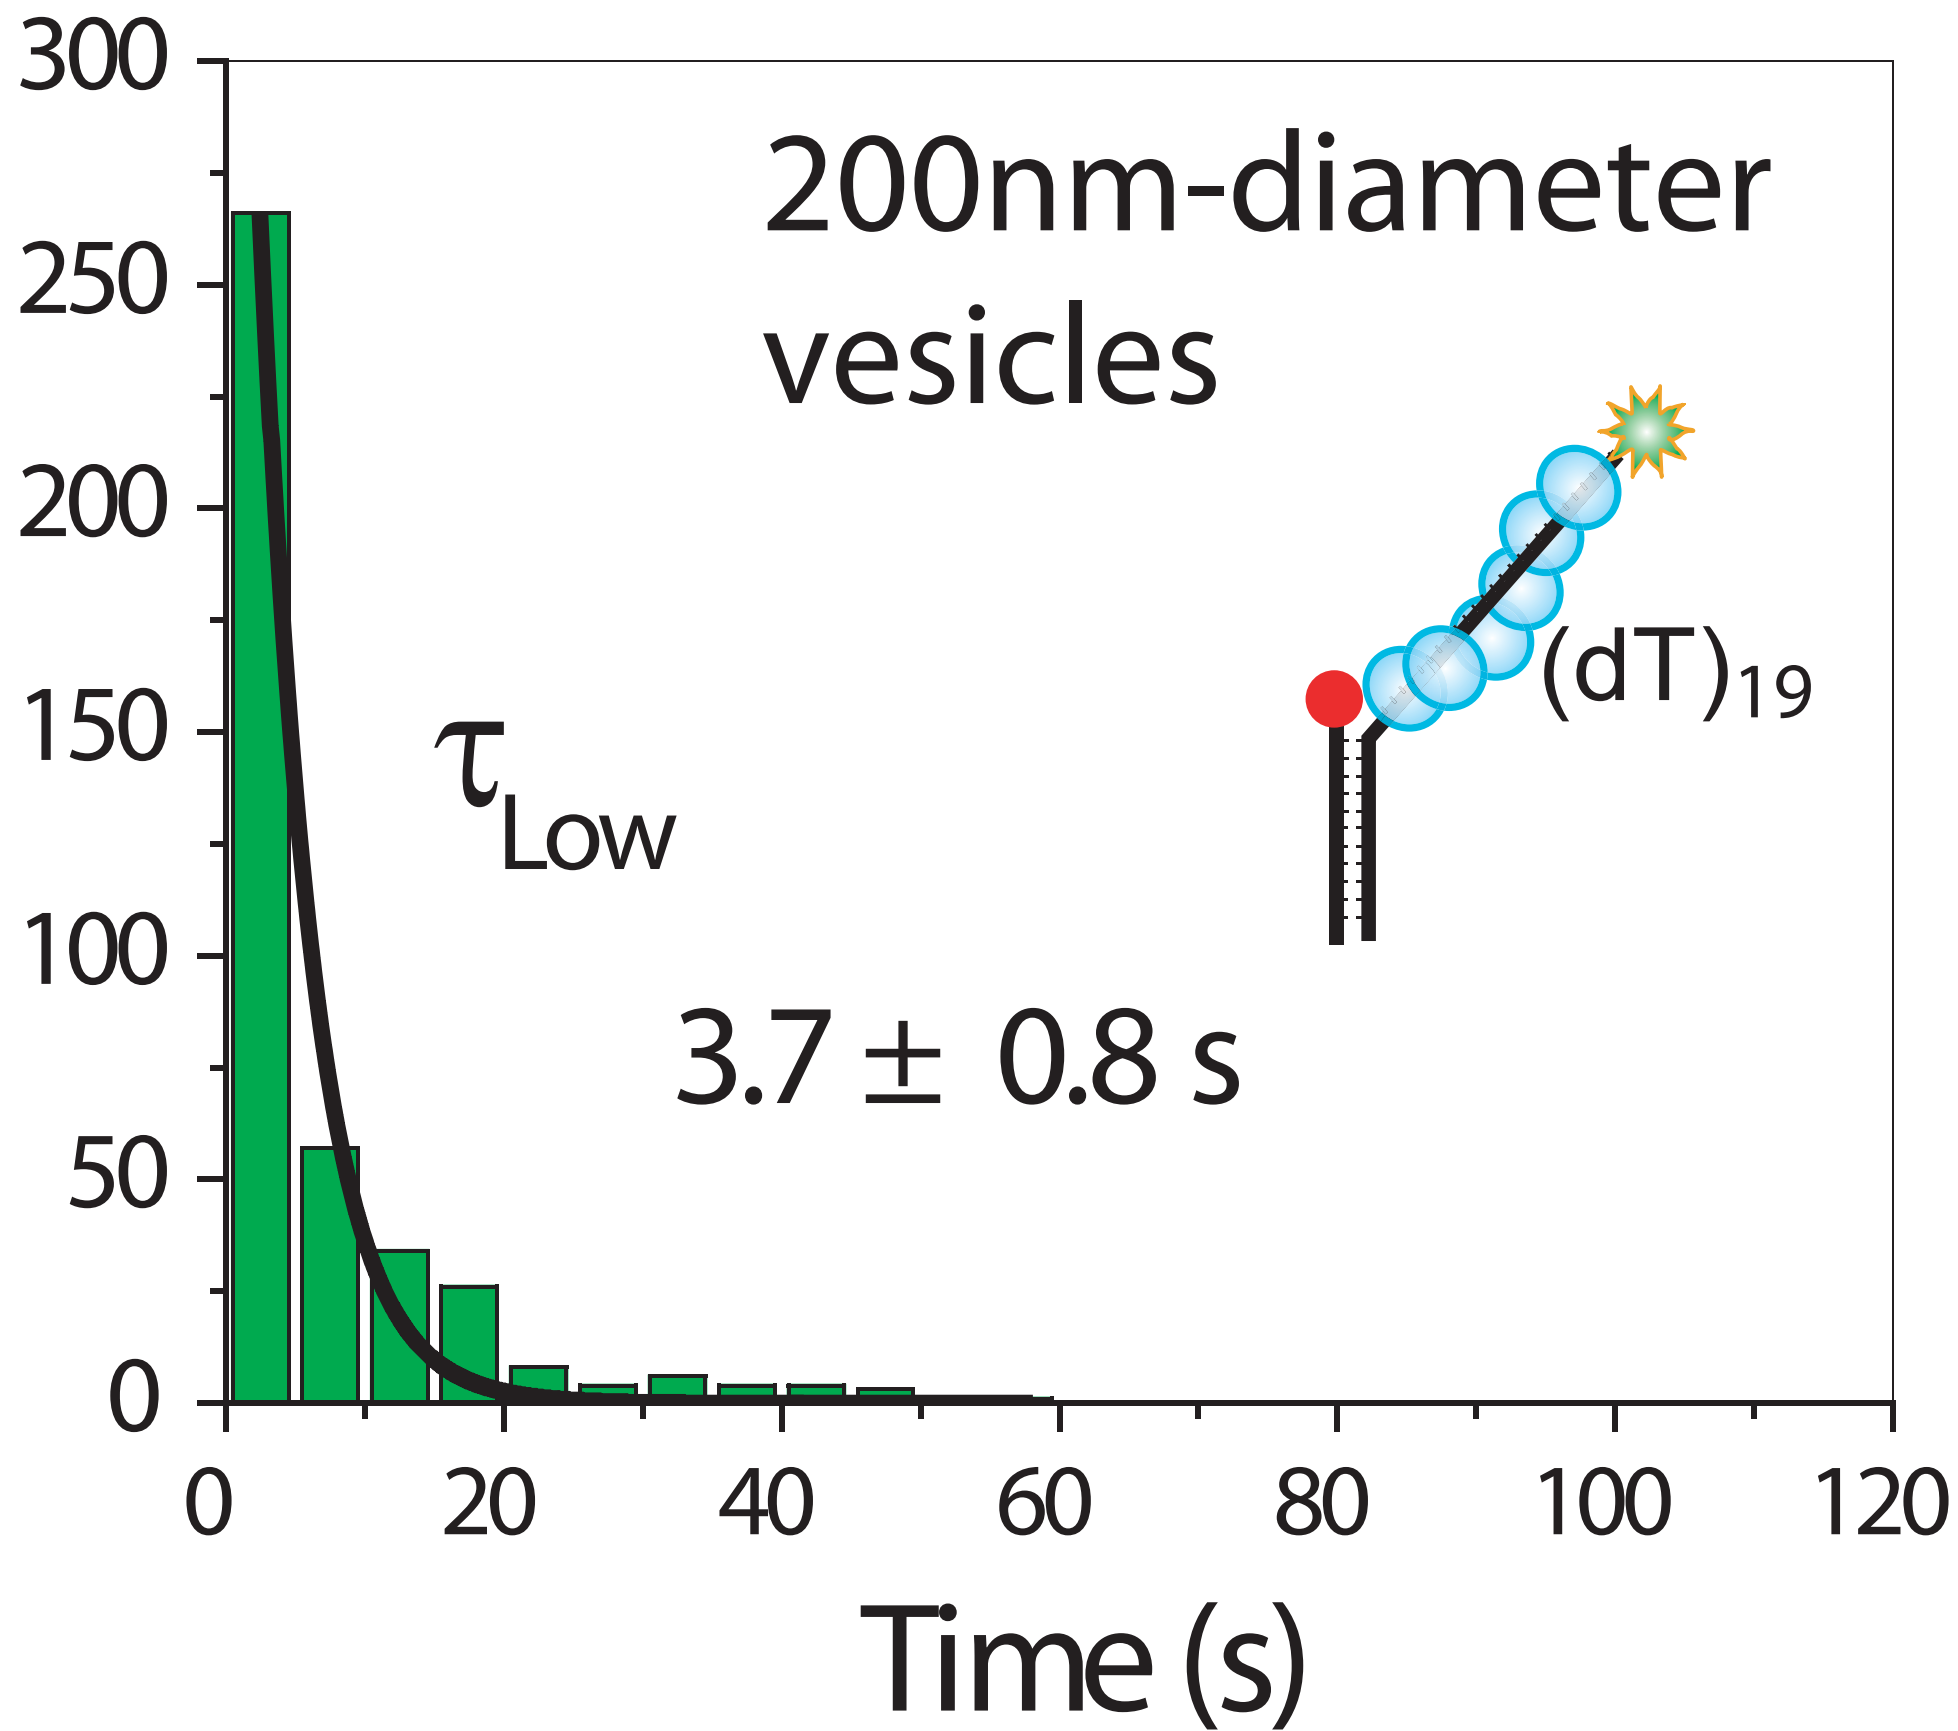

Supplement: pnas_0610673104_1.pdf [file pnas_0610673104_1.pdf]

**B**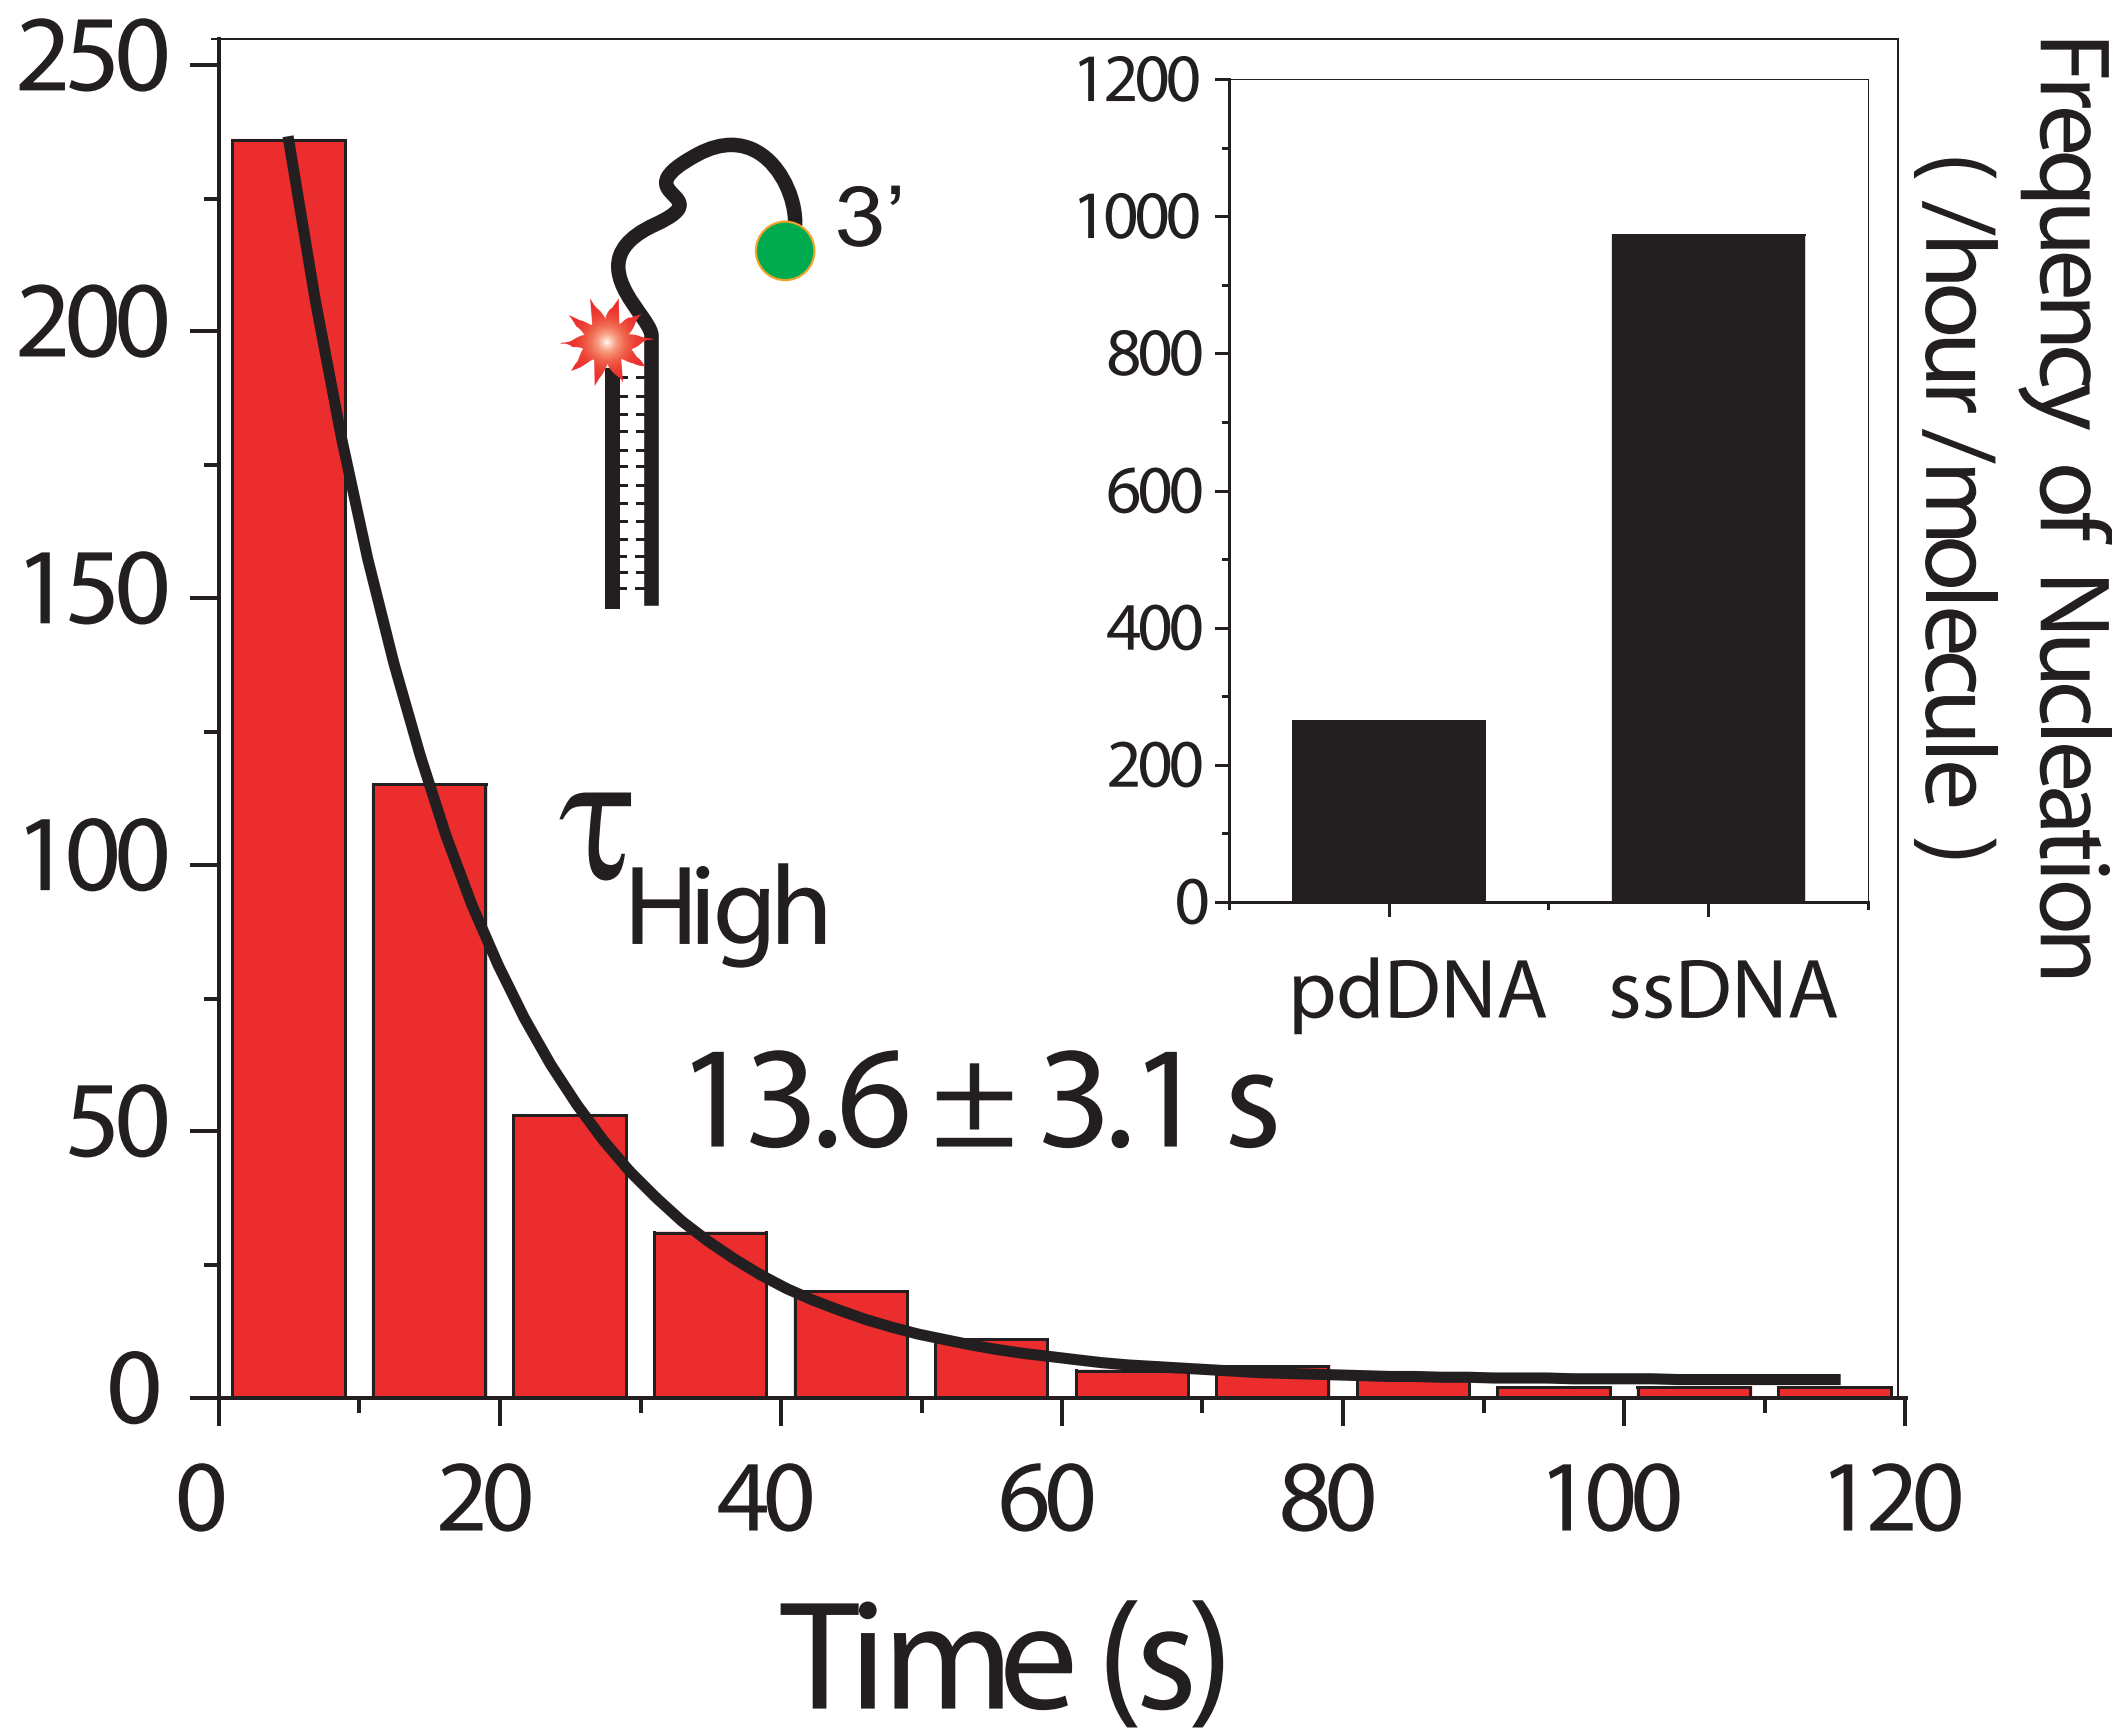

Supplement: pnas_0610673104_2.pdf [file pnas_0610673104_2.pdf]

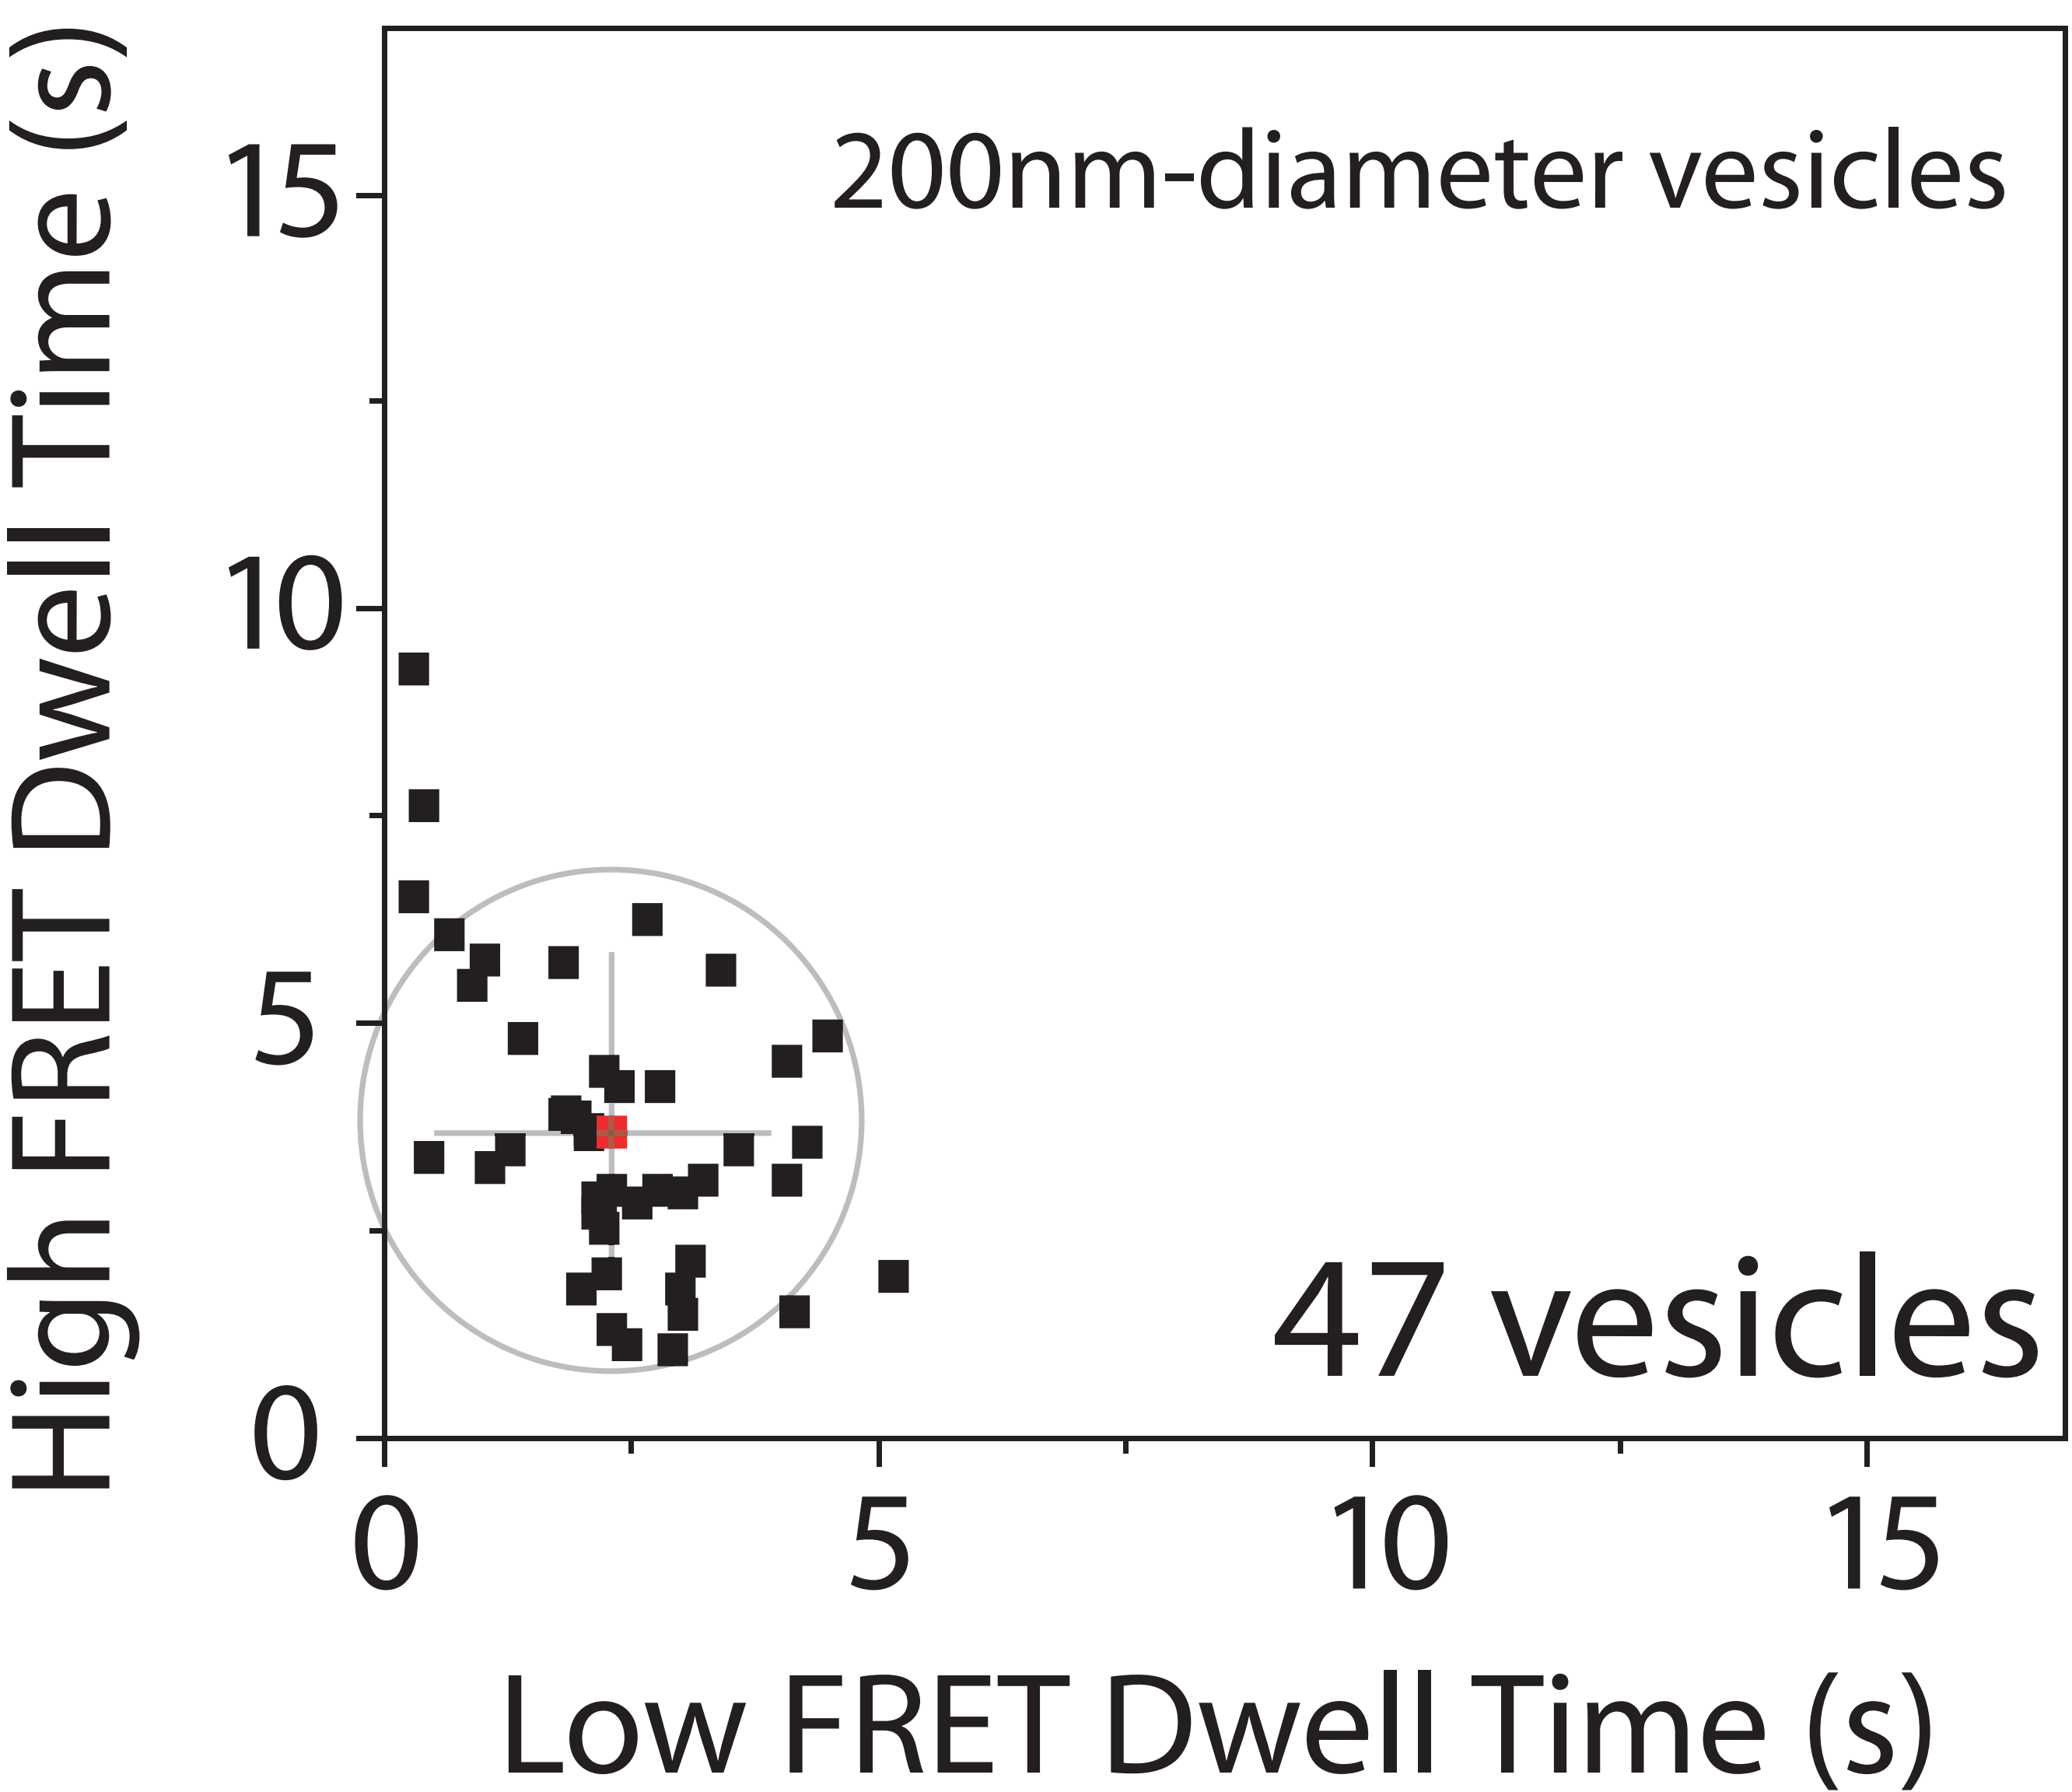

Supplement: pnas_0610673104_3.pdf [file pnas_0610673104_3.pdf]

**A**

Number of Transition

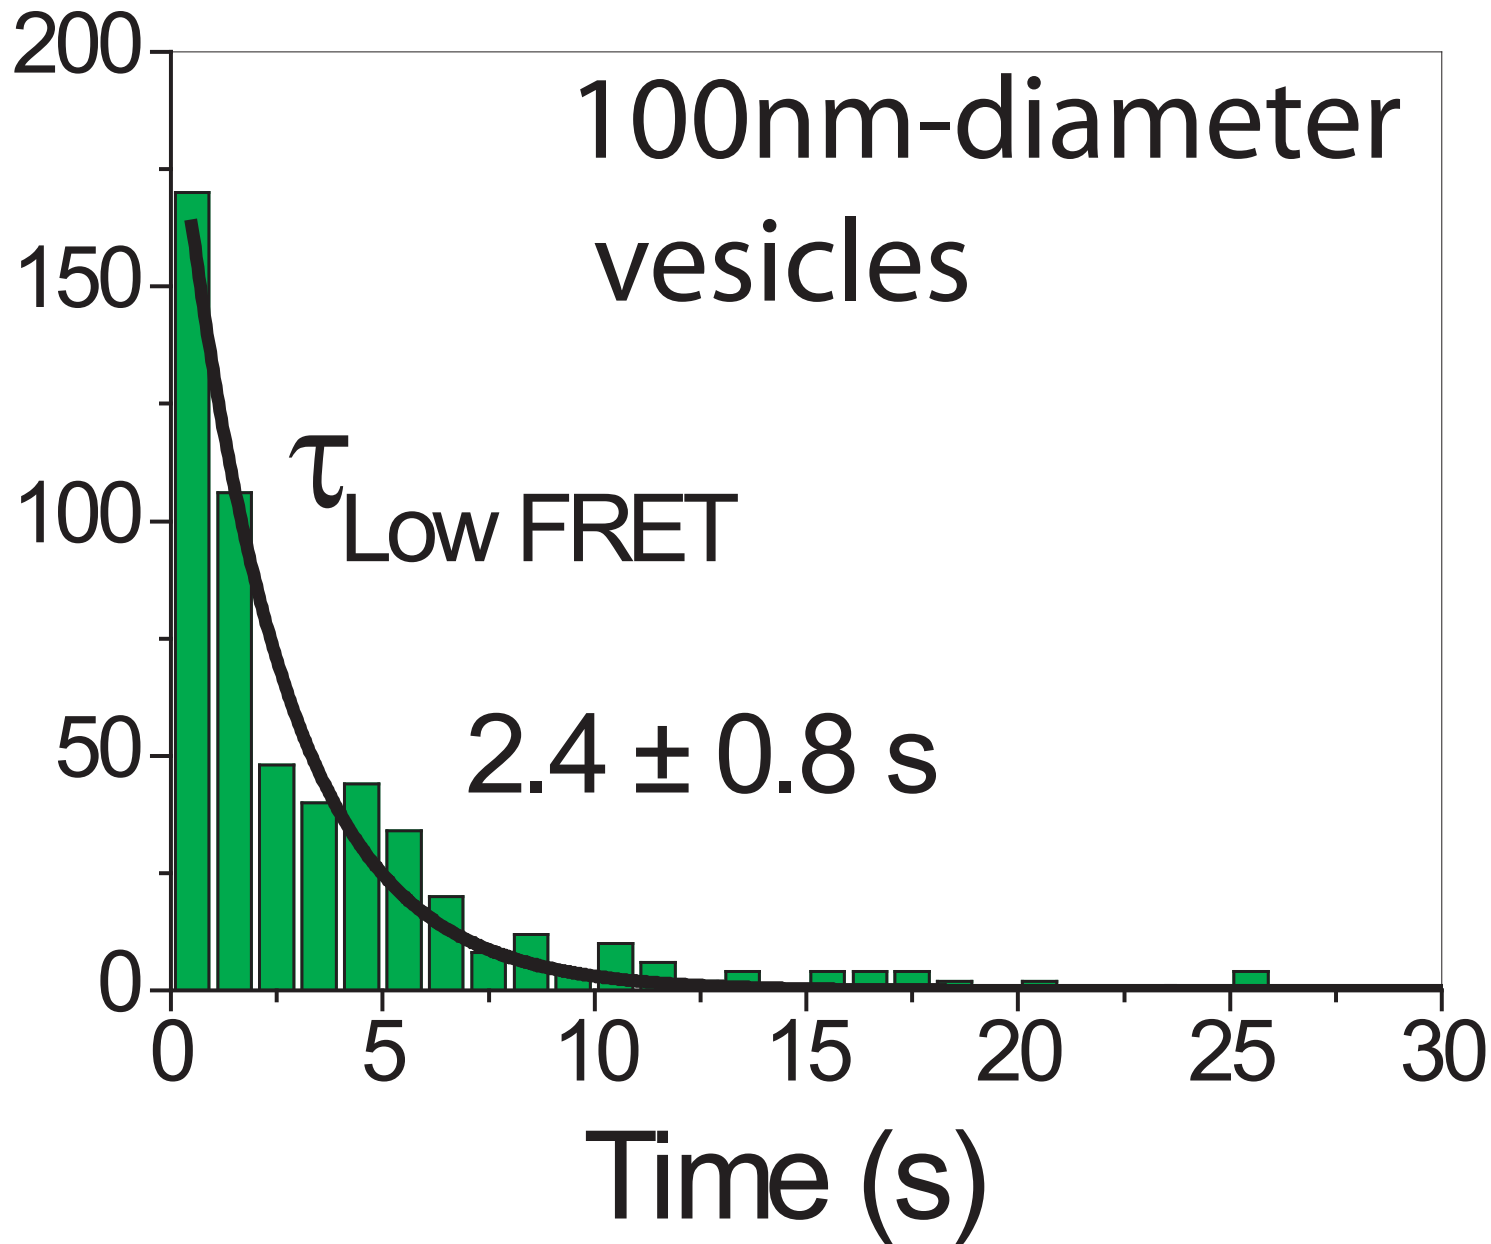

Supplement: pnas_0610673104_4.pdf [file pnas_0610673104_4.pdf]

**B**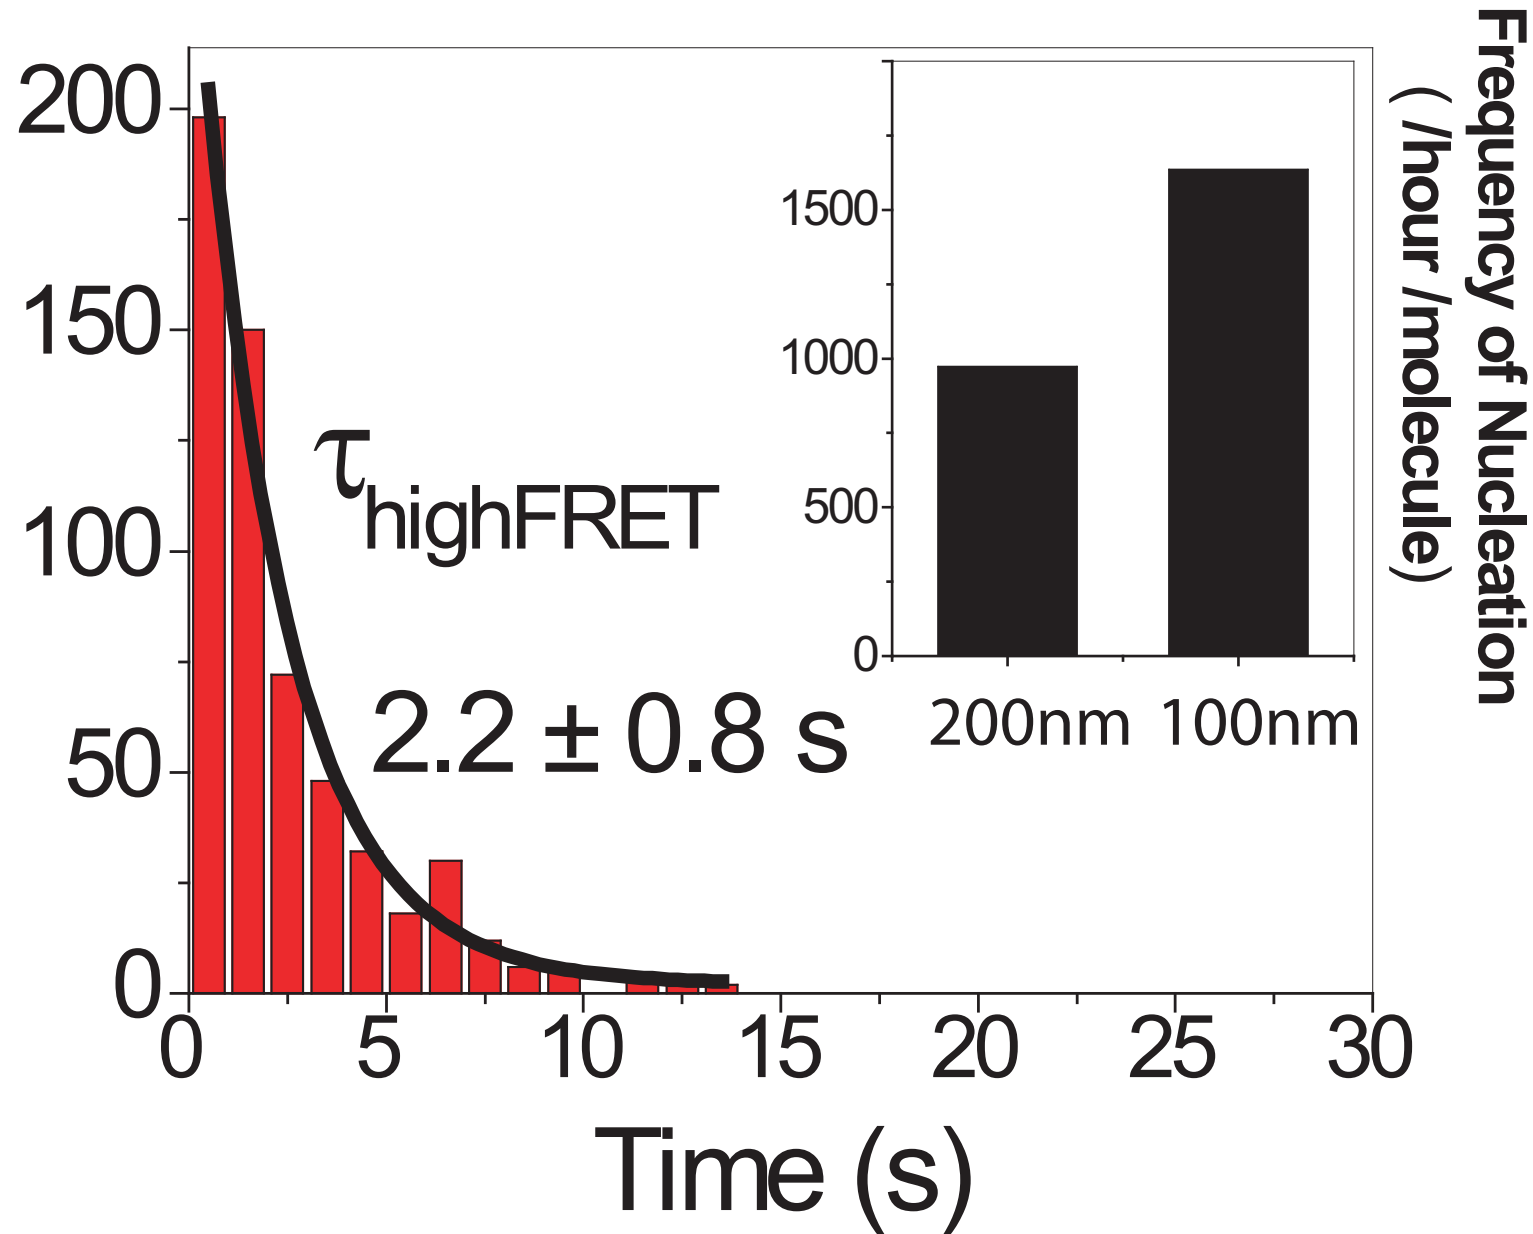

Supplement: pnas_0610673104_5.pdf [file pnas_0610673104_5.pdf]

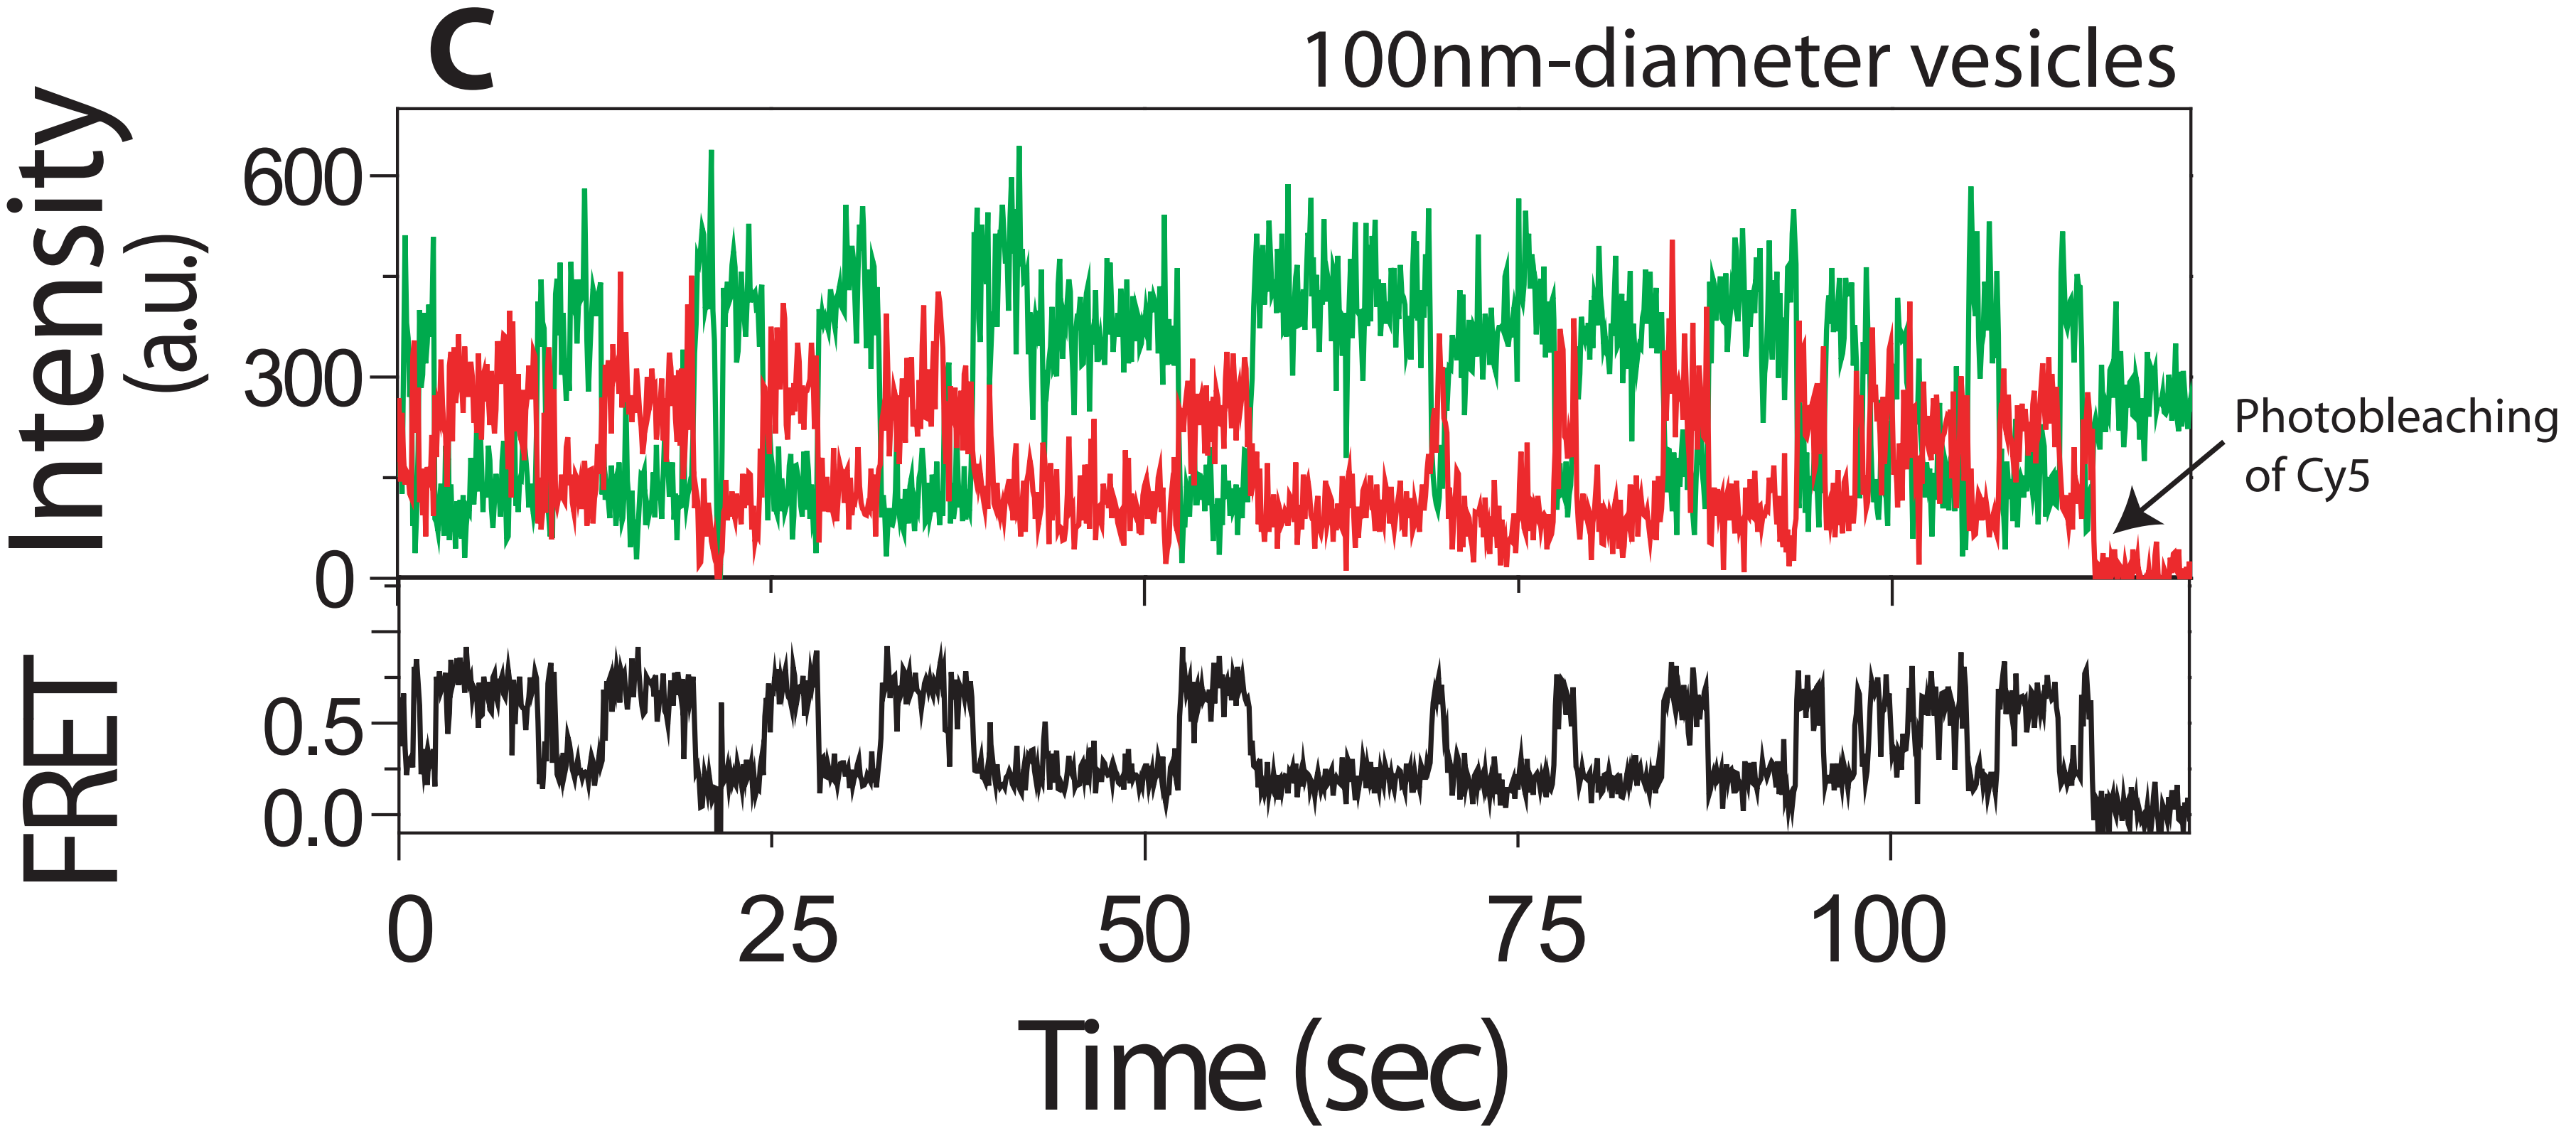

Supplement: pnas_0610673104_6.pdf [file pnas_0610673104_6.pdf]
